# Supplementary material for: A Comparison of the Immunometabolic Effect of Antibiotics and Plant Extracts in a Chicken Macrophage-like Cell Line during a Salmonella Enteritidis Challenge
Source: MDPI journal article supplement (doi:10.3390/antibiotics12020357), 2023-02-08

**Supplementary Table S1:** Changes in the phosphorylation of caspase 3 (CASP3;  $p \leq 0.05$ ) of HD11 cells infected with *S. Enteritidis* and treated with antibiotics or plant extracts.

| Group               | Protein and phosphorylation change <sup>1</sup> | Status of the protein <sup>2</sup> |
|---------------------|-------------------------------------------------|------------------------------------|
| Oxytetracycline     | CASP3 ↓                                         | Active                             |
| Gentamicin          | CASP3 ↑                                         | Non active                         |
| Thyme essential oil | No significant changes observed                 | -                                  |
| Grape seed extract  | No significant changes observed                 | -                                  |
| Garlic oil          | No significant changes observed                 | -                                  |
| Capsicum oleoresin  | No significant changes observed                 | -                                  |

<sup>1</sup> ↑, significantly more phosphorylated on an inhibitory site; ↓, significantly less phosphorylated on an inhibitory site.

<sup>2</sup> The status of the protein was assumed based on the phosphorylation change and the function of the affected site (active/inhibitory).

**Supplementary Figure S1:** Venn diagram of oxytetracycline, thyme essential oil, grape seed extract, and garlic oil, and changes in the phosphorylation of significant selected immune peptides (p ≤ 0.05) exclusive of oxytetracycline.

| Protein and phosphorylation change <sup>1</sup> | Status of the protein <sup>2</sup> |
|-------------------------------------------------|------------------------------------|
| CARD11 ↑                                        | Active                             |
| CASP3 ↓                                         | Active                             |
| CKIIα ↑                                         | Active                             |
| VEGFR-3 ↑                                       | Active                             |
| IFNAR1↓                                         | Active                             |
| PIK3R1 ↓                                        | Non active                         |

<sup>1</sup> ↑, significantly more phosphorylated and consequence of phosphorylation unknown; ↓, significantly less phosphorylated and consequence of phosphorylation unknown; ↑, significantly more phosphorylated on an active site; ↓, significantly less phosphorylated on an active site; ↑, significantly more phosphorylated on an inhibitory site; ↓, significantly less phosphorylated on an inhibitory site.

<sup>2</sup> The status of the protein was assumed based on the phosphorylation change and the function of the affected site (active/inhibitory) or, based on existing literature where no site information was available..

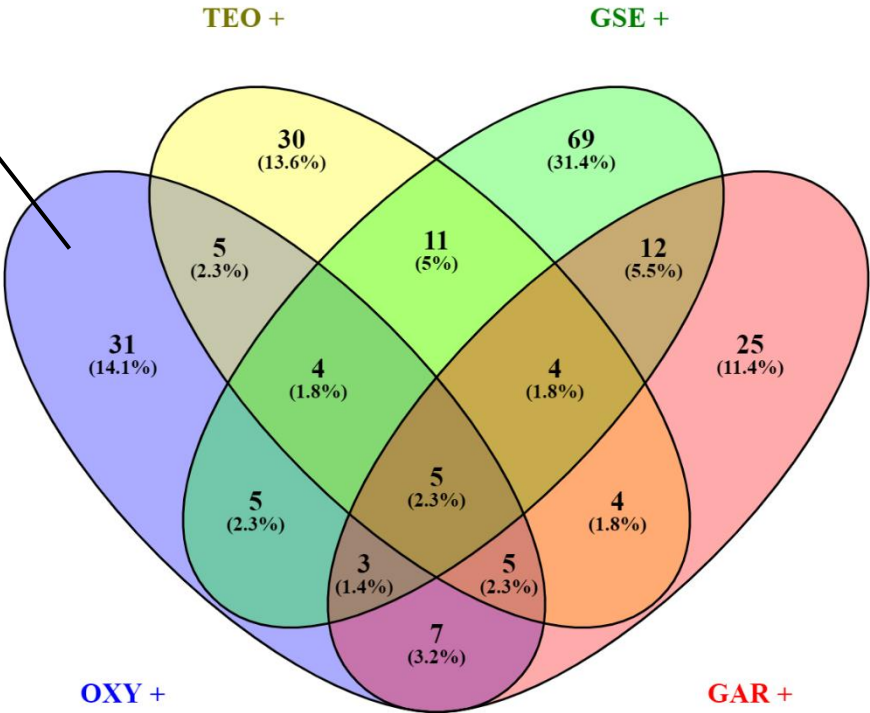

Supplement: s1 [file s1]
